# Supplementary material for: Resolvin D3 controls mouse and human TRPV1-positive neurons and preclinical progression of psoriasis
Source: PubMed Central journal article supplement (PMC7667671; doi:10.7150/thno.52135), 2020-10-26
Supplement: thnov10p12111s1.pdf [file thnov10p12111s1.pdf]

## Supplementary materials

### Figures:

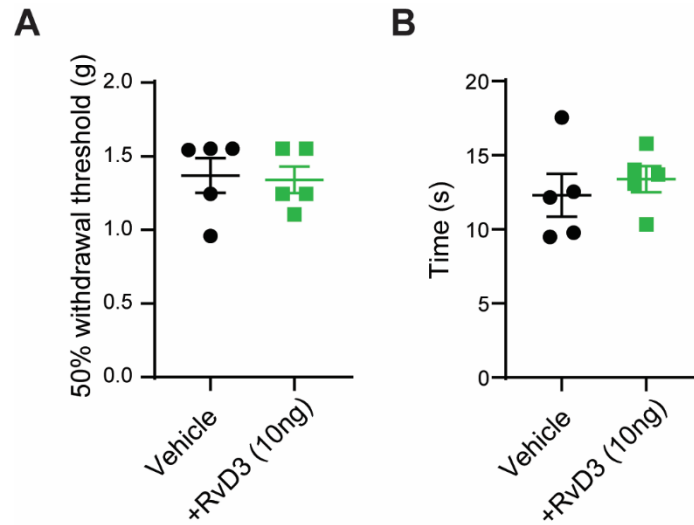

**Figure S1: RvD3 does not alter mechanical and thermal sensitivity.** (A) Mechanical sensitivity assessed by von Frey's test and (B) heat sensitivity assessed using the Hargreaves' in mice intradermally injected with RvD3 (10 ng) and a vehicle control (n = 5 mice/group). Statistical analysis: (A and B) two-tailed unpaired Student's t-test was used; data are depicted as mean  $\pm$  SEM.

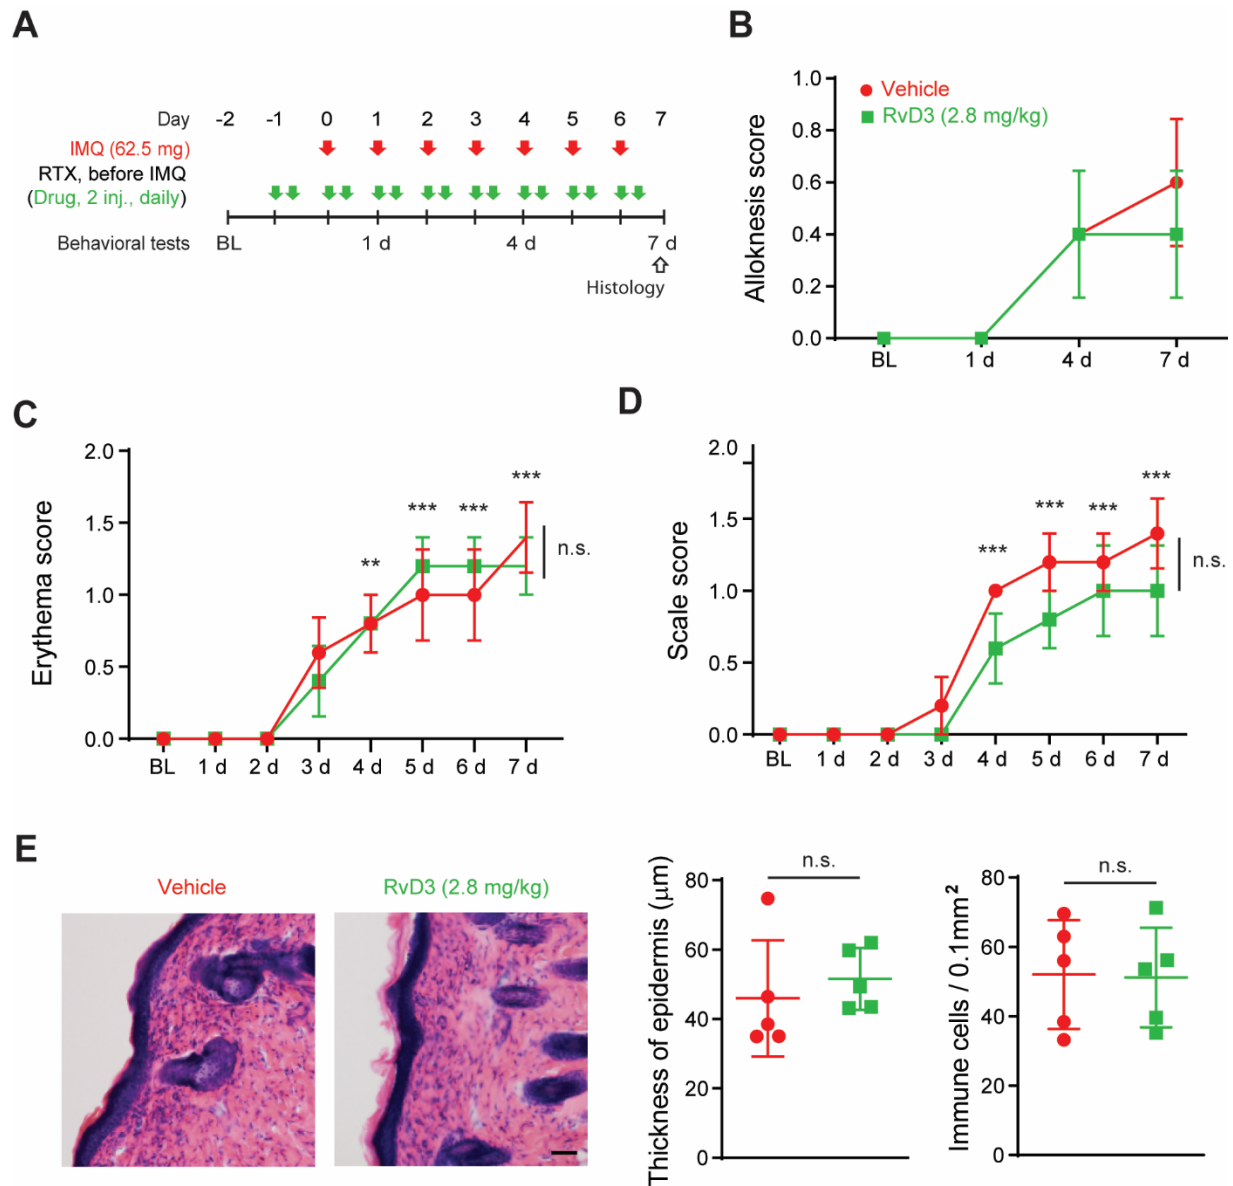

**Figure S2: Time course of resiniferatoxin (RTX) and RvD3 treatments on psoriasisform itch and skin inflammation.** (A) Experimental schematic indicating the daily topical applications of imiquimod (IMQ) to the nape of mice pre-treated with RTX, as well as the times of the vehicle control or RvD3 treatments and the behavioral tests. BL = Baseline (B) Time course of alloknesis scores, as well as (C and D) cutaneous erythema and scaliness in psoriatic mice (daily topical application of imiquimod cream), which were pre-treated with RTX and injected intraperitoneally with RvD3 (2 daily doses of 2.8 mg/kg, i.e. 2 inj.) or vehicle control (n = 5

mice/group). To note, spontaneous itch, erythema and scaliness significantly develop overtime in mice treated with RTX, but RvD3 treatments failed to show any additional effects compared to mice injected with a vehicle control. (E) Histopathology of skin tissues (Scale bar, 50µm), epidermis thickness and immune cell infiltration at 7 days after the first IMQ application in mice treated with RTX and injected intraperitoneally with RvD3 or vehicle control (n = 5 mice/group). Statistical analysis: (A-D) two-way ANOVA followed by Bonferroni post-hoc test; (E) two-tailed unpaired Student's t-test; data are depicted as mean ± SEM.; and \*\*p < 0.01, \*\*\*p < 0.001. n.s. = non-significant.

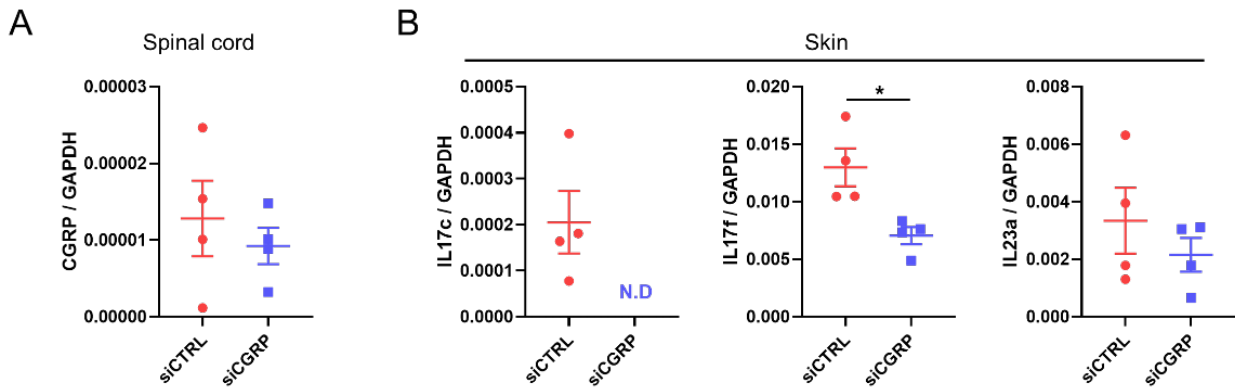

**Figure S3: CGRP knockdown in DRG tissue reduces cutaneous levels of interleukin-17.** (A) Spinal CGRP mRNA expression levels are unchanged, and (B) cutaneous interleukin (IL)-17c, IL-17f, and IL-23a mRNA expression levels at 7 days after the first imiquimod application in mice treated with intrathecal deliveries of siRNA (3 µg in 10 µL on day 0 and 5) against CGRP (siCGRP) or a control (siCTRL). Statistical analysis: (A and B) two-tailed unpaired Student's t-test was used; data are depicted as mean ± SEM.; and \*p < 0.05.

Table:

**Table S1. Primer sequences for qPCR**

| Target gene<br>(product length) | Primer sequences                                  | Accession number |
|---------------------------------|---------------------------------------------------|------------------|
| IL17c<br>(283bp)                | ATGCTTGTGTCGTGGATG<br>GTGCCTGGAATGTCTGTC          | NM_145834.3      |
| IL17f<br>(170bp)                | TGCTACTGTTGATGTTGGGAC<br>AATGCCCTGGTTTTGGTTGAA    | NM_145856.2      |
| IL22<br>(124bp)                 | ATGAGTTTTTCCCTTATGGGGAC<br>GCTGGAAGTTGGACACCTCAA  | NM_016971.2      |
| IL23a<br>(119bp)                | TGGATACGGGGCACATTATTTTT<br>CAGCAGCTCTCTCGGAATCTC  | NM_031252.2      |
| CGRP<br>(102bp)                 | GAGGGCTCTAGCTTGGACAG<br>AAGGTGTGAAACTTGTTGAGGT    | NM_007587.2      |
| NPPB<br>(100bp)                 | GAGGTCACCTCCTATCCTCTGG<br>GCCATTCCTCCGACTTTTCTC   | NM_008726.5      |
| SST<br>(160bp)                  | ACCGGGAACAGGAACTGG<br>TTGCTGGGTTCGAGTTGGC         | NM_009215.1      |
| GRP<br>(166bp)                  | CTGTTGGCTCTGGTCCTCTG<br>CATACAGGGACGGGGATTCA      | NM_175012.4      |
| TAC1<br>(86bp)                  | ATTCCTTTGTTGGACTAATGGGC<br>ACGTCTTCTTTCGTAGTTCTGC | NM_001311060.1   |
